# Supplementary material
Source: MDPI journal article supplement (https://www.mdpi.com/2227-9040/11/6/349)
Supplement: s1 [file s1 › chemosensors-2386869-SI.pdf]

*Supplementary Materials*

**MoS<sub>2</sub>@Au as label for sensitive sandwich-type immunoassay of  
neuron-specific enolase**

Yingying Wang<sup>1</sup>, Huixin Wang<sup>1</sup>, Yaliang Bai<sup>1</sup>, Guanhui Zhao<sup>2</sup>, Nuo Zhang<sup>2</sup>, Yong Zhang<sup>3</sup>,  
Yaoguang Wang<sup>1\*</sup>, Hong Chi<sup>1\*</sup>

<sup>1</sup> Shandong Provincial Key Laboratory of Molecular Engineering, School of Chemistry and Chemical Engineering, Qilu University of Technology (Shandong Academy of Sciences), Jinan 250353, People's Republic of China; [yingyingw1203@163.com](mailto:yingyingw1203@163.com) (Y.Y. Wang); [wanghuixin2014@163.com](mailto:wanghuixin2014@163.com) (H.X. Wang); [18463362393@163.com](mailto:18463362393@163.com) (Y.L. Bai)

<sup>2</sup> Collaborative Innovation Center for Green Chemical Manufacturing and Accurate Detection, Key Laboratory of Interfacial Reaction & Sensing Analysis in Universities of Shandong, School of Chemistry and Chemical Engineering, University of Jinan, Jinan 250022, People's Republic of China; [zhaoguanhui9001@163.com](mailto:zhaoguanhui9001@163.com) (G.H. Zhao); [chm\\_zhangn@ujn.edu.cn](mailto:chm_zhangn@ujn.edu.cn) (N. Zhang)

<sup>3</sup> Provincial Key Laboratory of Rural Energy Engineering in Yunnan, School of Energy and Environment Science, Yunnan Normal University, Kunming, 650500, People's Republic of China; [yongzhang7805@126.com](mailto:yongzhang7805@126.com) (Y. Zhang)

\*Correspondence: [wangyaoguang@qlu.edu.cn](mailto:wangyaoguang@qlu.edu.cn) (Y.G. Wang); [chihong@qlu.edu.cn](mailto:chihong@qlu.edu.cn) (H. Chi);  
Tel.: Tel. +86-531-82767872

# 1. Characterization results

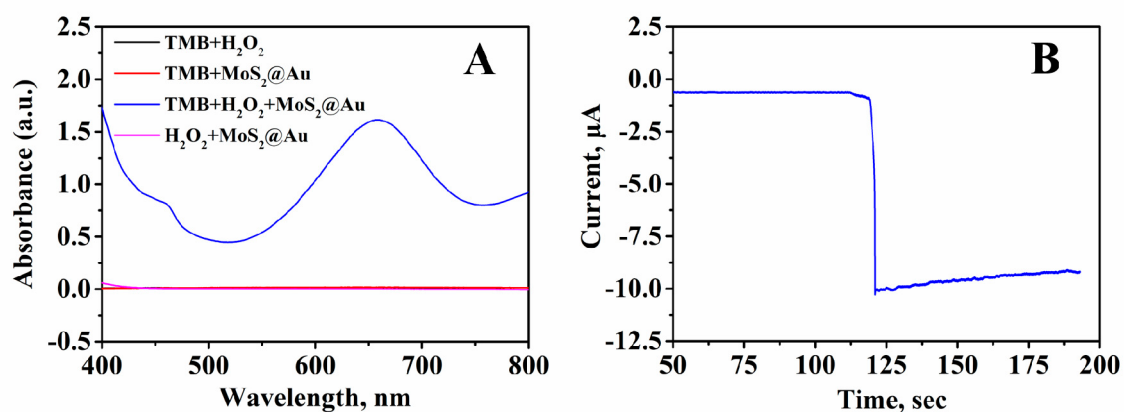

**Figure S1** (A) UV - vis absorption spectra of TMB with different substrates; (B) The i-t curve of 0.5 mg·mL<sup>-1</sup> MoS<sub>2</sub>@Au.

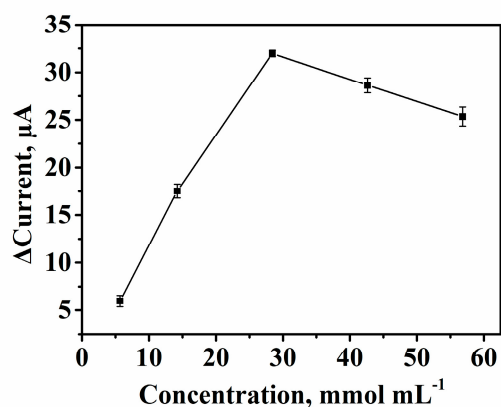

**Figure S2** Effect of the concentration of Au NPs on the current responses of immunosensor.

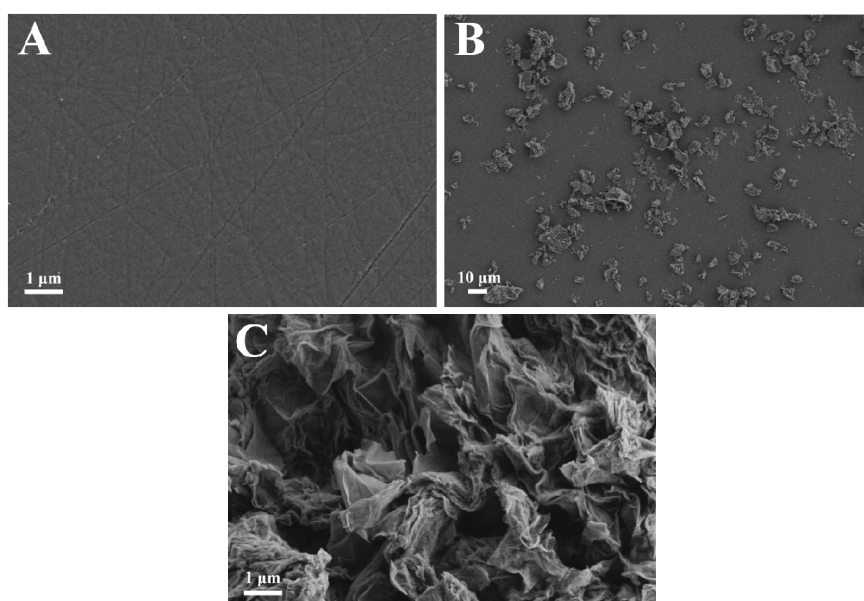

**Figure S3** The SEM of bare GCE (A) and rGO-TEPA/GCE (B-C).

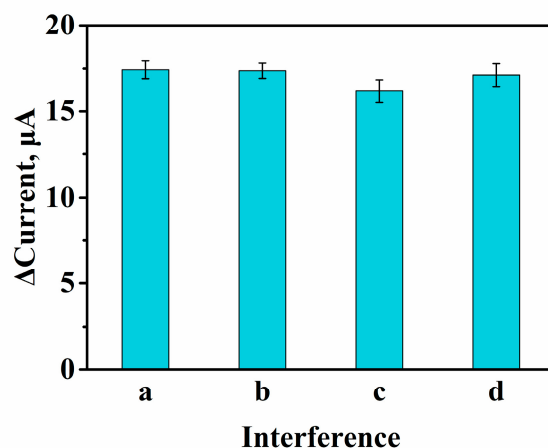

**Figure S4** The response of immunosensor in detecting interference: (a)  $10 \text{ ng} \cdot \text{mL}^{-1}$  CEA; (b)  $10 \text{ ng} \cdot \text{mL}^{-1}$  cyfra21-1; (c)  $10 \text{ ng} \cdot \text{mL}^{-1}$  BSA; (d)  $10 \text{ ng} \cdot \text{mL}^{-1}$  CEA +  $10 \text{ ng} \cdot \text{mL}^{-1}$  cyfra21-1 +  $10 \text{ ng} \cdot \text{mL}^{-1}$  BSA.

## 2. Calculation of detection limit

Detection limit which was expressed as the concentration ( $c_L$ ) is derived from the smallest measure ( $x_L$ ) that can be detected with reasonable certainty for a given analytical procedure. The value of  $x_L$  is given by the equation  $x_L = x_{bl} + k s_{bl}$ , where  $x_{bl}$  is the mean of the blank measures,  $s_{bl}$  is the standard deviation of the blank measures and  $k$  is a numerical factor chosen according to the confidence level desired. A value of 3 for  $k$  in equation is strongly recommended, and it usually corresponds to a confidence level of about 90% in a practical sense. The values for  $x_L$  and  $s_{bl}$  cannot usually be determined from theory but must be found experimentally by making a sufficiently large number of measurements (at least twenty times). Therefore, the  $c_L$  corresponds to the value calculated by the calibration plot obtained from a given analytical procedure where  $x_L = x_{bl} + 3 s_{bl}$ . In this work, after making twenty measurements of blank, the  $x_{bl} = 18.42$  and  $s_{bl} = 0.06$  was obtained. Then,  $x_L = 18.42 + 3 \times 0.06 = 18.60$ . The calibration plot of this proposed immunosensor is  $I = 3.07 \lg c + 31.79$ . Therefore, the  $c_L = 10^{(18.60 - 31.79)/3.07} = 0.05 \text{ pg} \cdot \text{mL}^{-1}$ , where  $I$  is the  $x_L = 18.60$ . In conclusion, the detection limit of this proposed immunosensor is  $0.05 \text{ pg} \cdot \text{mL}^{-1}$ .
